# Supplementary material
Source: PubMed Central journal article supplement (PMC5098651)
Supplement: pnas.1612047113.sapp.pdf [file pnas.1612047113.sapp.pdf]

**SUPPORTING INFORMATION FIGURE LEGENDS**

**Figure S1.** Genetic tools used to induce SOD KD in mid-prophase I, to assay the effect on NDJ, and to assay the frequency of recombinant chromosome missegregation. (A) The *matr* driver results in GAL4-VP16 expression in the female germline where it activates expression of a transgene encoding an RNAi hairpin. (B) Punnett square for the cross scheme used to assay NDJ. Green boxes represent progeny arising from normal chromosome segregation and purple boxes indicate progeny that arise from NDJ. Sex of viable progeny is indicated. The thick lined black box denotes the Diplo-X females collected for recombination history analysis. (C) Schematic illustrating the recombinational history assay. In this example, a bivalent with a single crossover missegregates resulting in a Diplo-X female that inherits one recombinant and one non-recombinant homolog. Her genotype is determined by scoring her male progeny for *X* chromosome markers.

**Figure S2.** SOD1 and SOD2 hairpins used in this study and immunoblots that show the change in SOD protein levels and oxidative damage induced by SOD KD. (A) Hairpins used to knock down SOD1 and SOD2 are diagrammed with nucleotides they target in parentheses. Superscripts indicate the vector used for each hairpin. (B) Representative immunoblots using ovary extracts from control and SOD KD genotypes used for the experiments shown in Figure 2. The SOD signal was normalized to tubulin, and mean SOD protein levels relative to the control are indicated below each lane (mean calculated from two repetitions). (C) Representative membrane with total protein (left) and anti-DNP immunoblot (right) on which oxidatively damaged proteins are detected in ovary extracts from SOD1<sup>V20</sup> KD and control genotypes. The DNP signal was normalized to total protein, and mean DNP levels relative to the control are indicated below each lane ( $P < 0.05$ , T-test,  $n = 3$ ). Note that the maximum intensity pixel on the

anti-DNP blot has a signal level of 47,574 that is well below the saturation value (65,536) of the 16-bit camera used to capture the image.

**Figure S3.** Percentage of oocytes for which the specified number of FISH arm spots was detected. For each KD genotype and its respective control in the indicated genetic background, the FISH data from Fig. 3C and Table S6 is presented as the distribution of oocytes containing the specified number of arm spots

**Figure S4.** X chromosome crossover frequency and distribution in SOD KD and control *mtrm*<sup>+/-</sup> oocytes. (A) Diagram shows the relative positions of visible markers along the X chromosome that were used to measure recombination. The centromere is represented by a filled in oval and the thicker black line depicts heterochromatin. (B-C) Meiotic crossovers were measured within three intervals: *sc-cv*, *cv-f*, and *f-car* in control and KD oocytes for SOD1<sup>V20</sup> (B) and SOD2<sup>V20</sup> (C). Genotypes correspond to those in Tables S2 and S3 respectively.

**A**

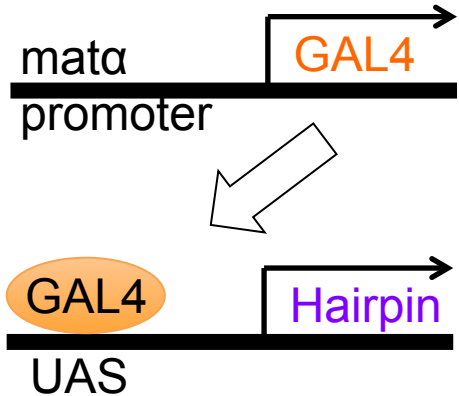

**B**

|         |            | Sperm                     |                      |
|---------|------------|---------------------------|----------------------|
|         |            | $X^A Y$                   | O                    |
| Oocytes | X (Normal) | $\frac{X}{X^A Y}$ ♀       | $\frac{X}{O}$ ♂      |
|         | XX (Diplo) | $\frac{XX}{X^A Y}$ Lethal | $\frac{XX}{O}$ ♀     |
|         | O (Nullo)  | $\frac{O}{X^A Y}$ ♂       | $\frac{O}{O}$ Lethal |

Legend:  = Normal       = Exceptional

**C**

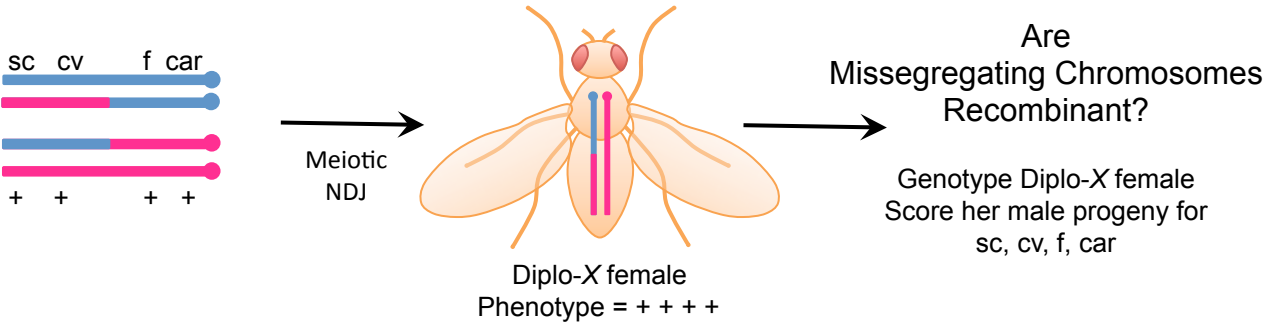

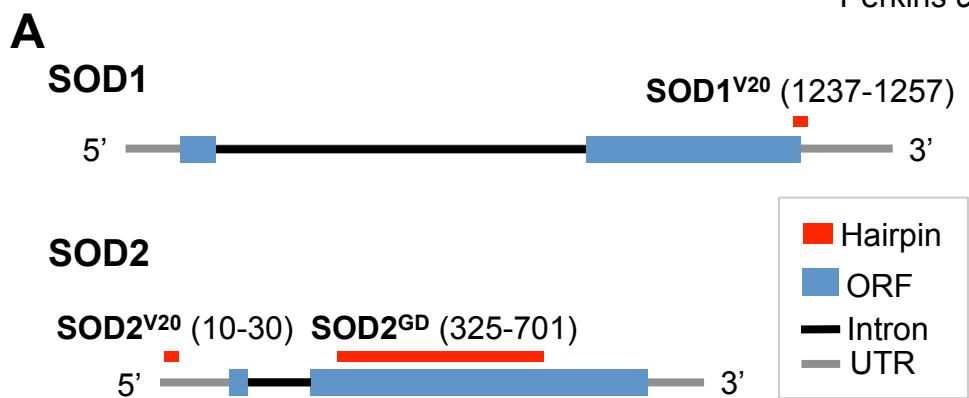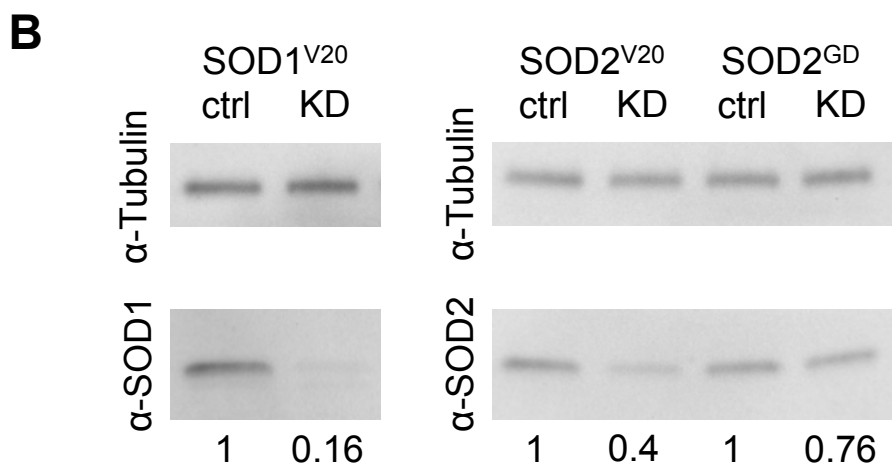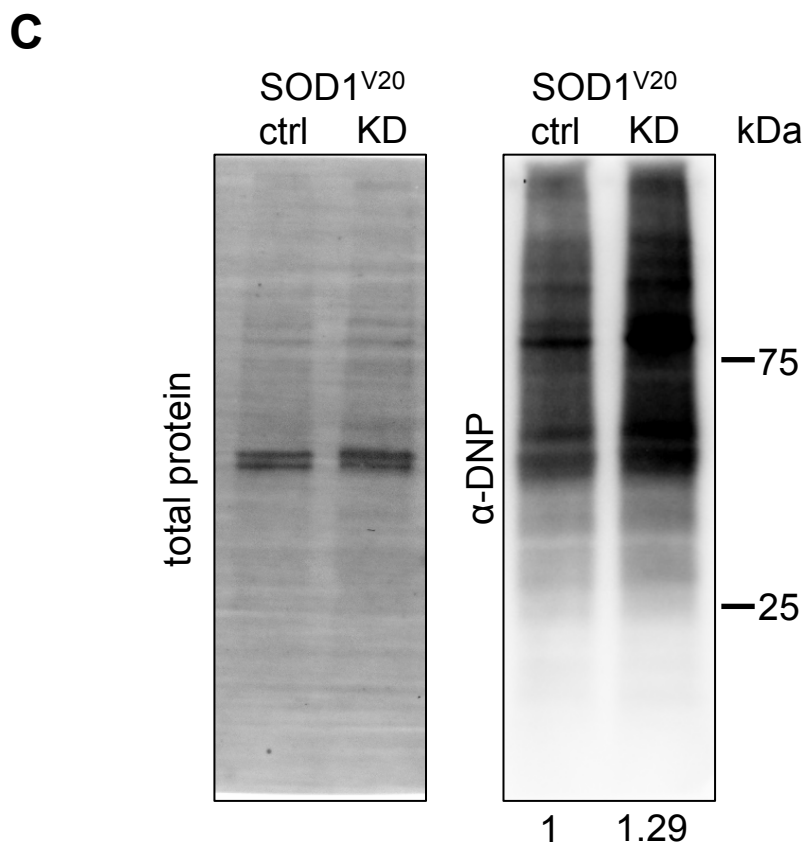

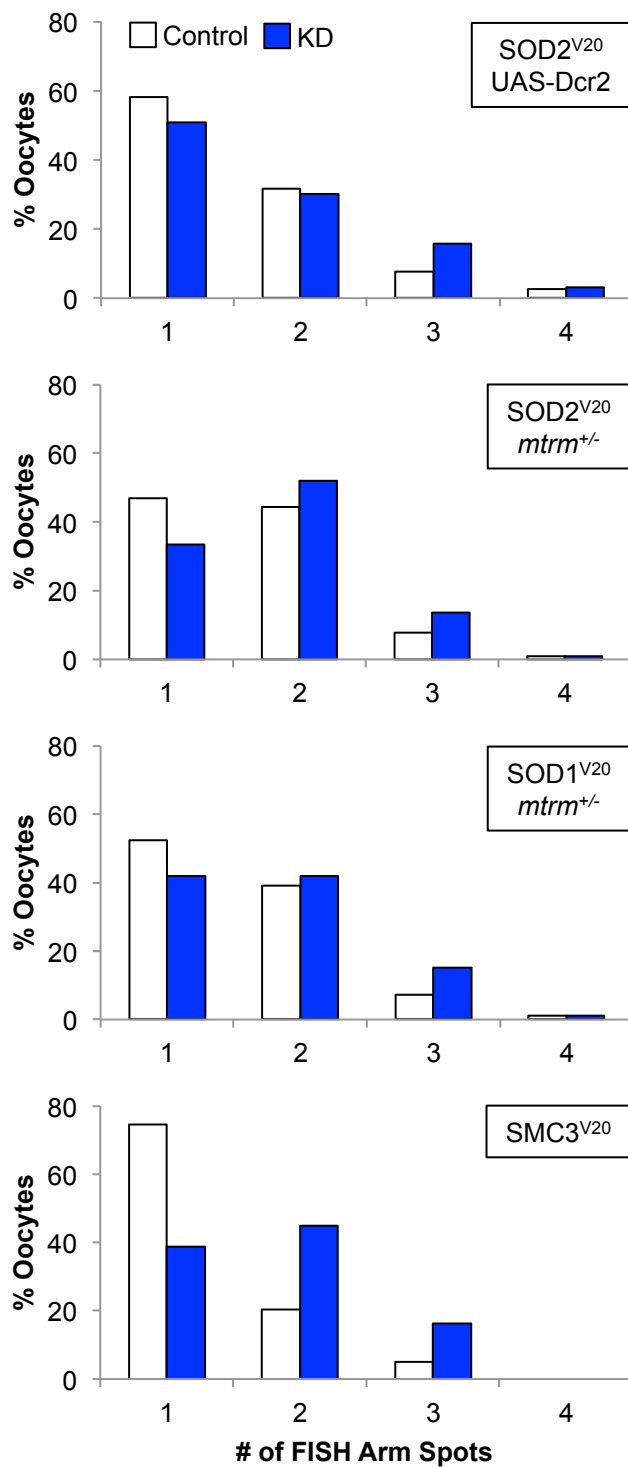



**Table S1: NDJ Results for SOD1 and SOD2 KD****A**

| Genotype                                                                                                                                                               | Stocks (Hairpin)         | % NDJ | % Diplo (#) | % Nullo (#) | n    | P-value |
|------------------------------------------------------------------------------------------------------------------------------------------------------------------------|--------------------------|-------|-------------|-------------|------|---------|
| <b>Control</b><br>y sc v/y ; cn bw sp/+ ; P{UAS-SOD1RNAi <sup>V20</sup> , y <sup>+</sup> v <sup>+</sup> }/+                                                            | I-454, H-072 (SH00934.N) | 0     | 0           | 0           | 1217 | 0.001   |
| <b>Knockdown</b><br>w P{UAS-Dcr2, w <sup>+</sup> }/y sc v ; + ; P{matalpha-GAL4-VP16, w <sup>+</sup> }/P{UAS-SOD1RNAi <sup>V20</sup> , y <sup>+</sup> v <sup>+</sup> } | T-712, H-072 (SH00934.N) | 1.28  | 0.81 (7)    | 0.46 (4)    | 1714 |         |

**B**

|                                                                                                                                                                   |                                 |      |          |          |     |       |
|-------------------------------------------------------------------------------------------------------------------------------------------------------------------|---------------------------------|------|----------|----------|-----|-------|
| <b>Control</b><br>w P{UAS-Dcr2, w <sup>+</sup> }/y ; cn bw sp/+ ; P{UAS-SOD2RNAi <sup>V20</sup> , y <sup>+</sup> v <sup>+</sup> }/+                               | I-454, V-062, H-028 (SH00930.N) | 0    | 0        | 0        | 895 | 0.008 |
| <b>Knockdown</b><br>w P{UAS-Dcr2, w <sup>+</sup> }/w ; + ; P{matalpha-GAL4-VP16, w <sup>+</sup> }/P{UAS-SOD2RNAi <sup>V20</sup> , y <sup>+</sup> v <sup>+</sup> } | T-273, V-062, H-028 (SH00930.N) | 1.44 | 0.41 (2) | 1.03 (5) | 962 |       |

**C**

|                                                                                                                                                     |                             |      |          |          |      |       |
|-----------------------------------------------------------------------------------------------------------------------------------------------------|-----------------------------|------|----------|----------|------|-------|
| <b>Control</b><br>w P{UAS-Dcr2, w <sup>+</sup> }/y ; P{UAS-SOD2RNAi <sup>GD</sup> , w <sup>+</sup> }/cn bw sp                                       | I-454, V-061, V-036 (14064) | 0.15 | 0.15 (1) | 0        | 1302 | 0.008 |
| <b>Knockdown</b><br>w P{UAS-Dcr2, w <sup>+</sup> }/w ; P{UAS-SOD2RNAi <sup>GD</sup> , w <sup>+</sup> }/+ ; P{matalpha-GAL4-VP16, w <sup>+</sup> }/+ | T-273, V-061, V-036 (14064) | 1.70 | 1.13 (6) | 0.57 (3) | 1049 |       |

Stocks refers to the Bickel Lab stock used to generate the genotype listed, see Table S8 for full descriptions.

Hairpin refers to the TRiP or VDRC collection hairpin ID.

# indicates number of progeny recovered in this category.

n equals total number of progeny scored.

P-value calculated as described in (72).

**Table S2: NDJ Results for SOD1<sup>V20</sup> KD in *mtrm*<sup>+/-</sup>**

| Experiment #1                                                                                                                                                                | Stocks (Hairpin)         | % NDJ | % Diplo (#) | % Nullo (#) | n    | P-value <sup>§</sup> |
|------------------------------------------------------------------------------------------------------------------------------------------------------------------------------|--------------------------|-------|-------------|-------------|------|----------------------|
| <b>Control</b><br>y sc cv v f car/y ; + ;<br>mtrm <sup>KG</sup> ry/<br>P{UAS-SOD1RNAi <sup>V20</sup> , y <sup>+</sup> v <sup>+</sup> }                                       | M-835, I-513 (SH00934.N) | 1.51  | 0.93 (8)    | 0.58 (5)    | 1714 | <0.001               |
| <b>Knockdown</b><br>y sc cv v f car/y ; + ; P{matalpha-GAL4-VP16, w <sup>+</sup> } mtrm <sup>KG</sup> ry/<br>P{UAS-SOD1RNAi <sup>V20</sup> , y <sup>+</sup> v <sup>+</sup> } | M-834, I-513 (SH00934.N) | 8.18  | 5.69 (48)   | 2.49 (21)   | 1619 |                      |

| Experiment #2                                                                                                                                                                |                          |      |           |           |      |        |
|------------------------------------------------------------------------------------------------------------------------------------------------------------------------------|--------------------------|------|-----------|-----------|------|--------|
| <b>Control</b><br>y sc cv v f car/y ; + ;<br>mtrm <sup>KG</sup> ry/<br>P{UAS-SOD1RNAi <sup>V20</sup> , y <sup>+</sup> v <sup>+</sup> }                                       | M-836, I-513 (SH00934.N) | 3.09 | 2.40 (21) | 0.69 (6)  | 1723 | <0.001 |
| <b>Knockdown</b><br>y sc cv v f car/y ; + ; P{matalpha-GAL4-VP16, w <sup>+</sup> } mtrm <sup>KG</sup> ry/<br>P{UAS-SOD1RNAi <sup>V20</sup> , y <sup>+</sup> v <sup>+</sup> } | M-834, I-513 (SH00934.N) | 7.13 | 4.40 (37) | 2.73 (23) | 1622 |        |

| Mean                                                                                                                                                                         | Hairpin   | % NDJ | P-value <sup>¶</sup> |
|------------------------------------------------------------------------------------------------------------------------------------------------------------------------------|-----------|-------|----------------------|
| <b>Control</b><br>y sc cv v f car/y ; + ;<br>mtrm <sup>KG</sup> ry/<br>P{UAS-SOD1RNAi <sup>V20</sup> , y <sup>+</sup> v <sup>+</sup> }                                       | SH00934.N | 2.30  | 0.030                |
| <b>Knockdown</b><br>y sc cv v f car/y ; + ; P{matalpha-GAL4-VP16, w <sup>+</sup> } mtrm <sup>KG</sup> ry/<br>P{UAS-SOD1RNAi <sup>V20</sup> , y <sup>+</sup> v <sup>+</sup> } | SH00934.N | 7.66  |                      |

Stocks refers to the Bickel Lab stock used to generate the genotype listed, see Table S8 for full descriptions.

Hairpin refers to the TRiP collection hairpin ID.

# indicates number of progeny recovered in this category.

n equals total number of progeny scored.

§ P-value calculated as described in (72).

¶ P-value calculated using a T-test, n = 2.



**Table S3: NDJ Results for SOD2<sup>V20</sup> KD in *mtrm*<sup>+/-</sup>**

| Experiment #1                                                                                                                                                                | Stocks (Hairpin)         | % NDJ | % Diplo (#) | % Nullo (#) | n    | P-value <sup>§</sup> |
|------------------------------------------------------------------------------------------------------------------------------------------------------------------------------|--------------------------|-------|-------------|-------------|------|----------------------|
| <b>Control</b><br>y sc cv v f car/y ; + ;<br>mtrm <sup>KG</sup> ry/<br>P{UAS-SOD2RNAi <sup>V20</sup> , y <sup>+</sup> v <sup>+</sup> }                                       | M-836, I-515 (SH00930.N) | 1.68  | 0.91 (7)    | 0.78 (6)    | 1533 | <0.001               |
| <b>Knockdown</b><br>y sc cv v f car/y ; + ; P{matalpha-GAL4-VP16, w <sup>+</sup> } mtrm <sup>KG</sup> ry/<br>P{UAS-SOD2RNAi <sup>V20</sup> , y <sup>+</sup> v <sup>+</sup> } | M-834, I-515 (SH00930.N) | 7.12  | 5.69 (24)   | 1.42 (6)    | 813  |                      |

| Experiment #2                                                                                                                                                                |                          |      |           |           |      |        |
|------------------------------------------------------------------------------------------------------------------------------------------------------------------------------|--------------------------|------|-----------|-----------|------|--------|
| <b>Control</b><br>y sc cv v f car/y ; + ;<br>mtrm <sup>KG</sup> ry/<br>P{UAS-SOD2RNAi <sup>V20</sup> , y <sup>+</sup> v <sup>+</sup> }                                       | M-835, I-515 (SH00930.N) | 3.56 | 2.16 (20) | 1.4 (13)  | 1823 | <0.001 |
| <b>Knockdown</b><br>y sc cv v f car/y ; + ; P{matalpha-GAL4-VP16, w <sup>+</sup> } mtrm <sup>KG</sup> ry/<br>P{UAS-SOD2RNAi <sup>V20</sup> , y <sup>+</sup> v <sup>+</sup> } | M-834, I-515 (SH00930.N) | 7.99 | 5.11 (46) | 2.89 (26) | 1730 |        |

| Mean                                                                                                                                                                         | Hairpin   | % NDJ | P-value <sup>¶</sup> |
|------------------------------------------------------------------------------------------------------------------------------------------------------------------------------|-----------|-------|----------------------|
| <b>Control</b><br>y sc cv v f car/y ; + ;<br>mtrm <sup>KG</sup> ry/<br>P{UAS-SOD2RNAi <sup>V20</sup> , y <sup>+</sup> v <sup>+</sup> }                                       | SH00930.N | 2.62  | 0.041                |
| <b>Knockdown</b><br>y sc cv v f car/y ; + ; P{matalpha-GAL4-VP16, w <sup>+</sup> } mtrm <sup>KG</sup> ry/<br>P{UAS-SOD2RNAi <sup>V20</sup> , y <sup>+</sup> v <sup>+</sup> } | SH00930.N | 7.56  |                      |

Stocks refers to the Bickel Lab stock used to generate the genotype listed, see Table S8 for full descriptions.

Hairpin refers to the TRiP collection hairpin ID.

# indicates number of progeny recovered in this category.

n equals total number of progeny scored.

§ P-value calculated as described in (72).

¶ P-value calculated using a T-test, n = 2.

**Table S4: NDJ Results for SOD2<sup>GD</sup> KD in *mtrm*<sup>+/-</sup>**

| Experiment #1                                                                                                                                                         | Stocks (Hairpin)        | % NDJ | % Diplo (#)  | % Nullo (#)  | n    | P-value <sup>§</sup> |
|-----------------------------------------------------------------------------------------------------------------------------------------------------------------------|-------------------------|-------|--------------|--------------|------|----------------------|
| <b>Control</b><br>y sc cv v f car/y ;<br>P{UAS-SOD2RNAi <sup>GD</sup> , w <sup>+</sup> }/+ ;<br>mtrm <sup>KG</sup> ry/+                                               | M-836, I-514<br>(14064) | 2.85  | 1.43<br>(13) | 1.43<br>(13) | 1798 | <0.001               |
| <b>Knockdown</b><br>y sc cv v f car/y ; ;<br>P{UAS-SOD2RNAi <sup>GD</sup> , w <sup>+</sup> }/+ ;<br>P{matalpha-GAL4-VP16, w <sup>+</sup> }<br>mtrm <sup>KG</sup> ry/+ | M-834, I-514<br>(14064) | 6.87  | 5.05<br>(47) | 1.83<br>(17) | 1799 |                      |

| Experiment #2                                                                                                                                                         |                         |      |              |              |      |        |
|-----------------------------------------------------------------------------------------------------------------------------------------------------------------------|-------------------------|------|--------------|--------------|------|--------|
| <b>Control</b><br>y sc cv v f car/y ;<br>P{UAS-SOD2RNAi <sup>GD</sup> , w <sup>+</sup> }/+ ;<br>mtrm <sup>KG</sup> ry/+                                               | M-835, I-514<br>(14064) | 1.95 | 1.58<br>(17) | 0.37<br>(4)  | 2128 | <0.001 |
| <b>Knockdown</b><br>y sc cv v f car/y ; ;<br>P{UAS-SOD2RNAi <sup>GD</sup> , w <sup>+</sup> }/+ ;<br>P{matalpha-GAL4-VP16, w <sup>+</sup> }<br>mtrm <sup>KG</sup> ry/+ | M-834, I-514<br>(14064) | 7.03 | 4.16<br>(45) | 2.87<br>(31) | 2085 |        |

| Mean                                                                                                                                                                | Hairpin | % NDJ | P-value <sup>¶</sup> |
|---------------------------------------------------------------------------------------------------------------------------------------------------------------------|---------|-------|----------------------|
| <b>Control</b><br>y sc cv v f car/y ;<br>P{UAS-SOD2RNAi <sup>GD</sup> , w <sup>+</sup> }/+ ;<br>mtrm <sup>KG</sup> ry/+                                             | 14064   | 2.40  | 0.010                |
| <b>Knockdown</b><br>y sc cv v f car/y ;<br>P{UAS-SOD2RNAi <sup>GD</sup> , w <sup>+</sup> }/+ ;<br>P{matalpha-GAL4-VP16, w <sup>+</sup> }<br>mtrm <sup>KG</sup> ry/+ | 14064   | 6.95  |                      |

Stocks refers to the Bickel Lab stock used to generate the genotype listed, see Table S8 for full descriptions.

Hairpin refers to the VDRC collection hairpin ID.

# indicates number of progeny recovered in this category.

n equals total number of progeny scored.

§ P-value calculated as described in (72).

¶ P-value calculated using a T-test, n = 2.

**Table S5: NDJ Results for SOD2<sup>GD</sup> KD in *smc1Δ/+***

| Genotype                                                                                                                                                               | Stocks (Hairpin)     | % NDJ | % Diplo (#) | % Nullo (#) | n    | P-value |
|------------------------------------------------------------------------------------------------------------------------------------------------------------------------|----------------------|-------|-------------|-------------|------|---------|
| <b>smc1Δ</b><br>w, P{UAS-Dcr2, w <sup>+</sup> }/y ; P{UAS-SOD2RNAi <sup>GD</sup> , w <sup>+</sup> }/+ ; smc1Δ/+                                                        | T-733, I-540 (14064) | 0.09  | 0.09 (1)    | 0           | 2311 |         |
| <b>Control</b><br>w, P{UAS-Dcr2, w <sup>+</sup> }/y ; P{UAS-SOD2RNAi <sup>GD</sup> , w <sup>+</sup> }/+ ; +                                                            | T-733, I-514 (14064) | 0.17  | 0.08 (1)    | 0.08 (1)    | 2393 |         |
| <b>SOD2<sup>GD</sup> KD</b><br>w, P{UAS-Dcr2, w <sup>+</sup> }/y ; P{UAS-SOD2RNAi <sup>GD</sup> , w <sup>+</sup> }/+ ; P{matα-GAL4-VP16, w <sup>+</sup> }/+            | T-712 I-514 (14064)  | 0.89  | 0.30 (3)    | 0.59 (6)    | 2024 |         |
| <b>SOD2<sup>GD</sup> KD, smc1Δ</b><br>w, P{UAS-Dcr2, w <sup>+</sup> }/y ; P{UAS-SOD2RNAi <sup>GD</sup> , w <sup>+</sup> }/+ ; P{matα-GAL4-VP16, w <sup>+</sup> }/smc1Δ | T-712, I-540 (14064) | 2.23  | 1.19 (15)   | 1.03 (13)   | 2485 |         |

Stocks refers to the Bickel Lab stock used to generate the genotype listed, see Table S8 for full descriptions.

Hairpin refers to the TRiP or VDRC collection hairpin ID.

# indicates number of progeny recovered in this category.

n equals total number of progeny scored.

P-value calculated as described in (72).

**Table S6: Summary of FISH Data**

| SOD2 <sup>V20</sup> with UAS-Dcr2      | Experiment 1                               |             | Experiment 2 |             | Sum of Experiments |              | Fold Increase | P-value <sup>§</sup> |
|----------------------------------------|--------------------------------------------|-------------|--------------|-------------|--------------------|--------------|---------------|----------------------|
|                                        | Control                                    | KD          | Control      | KD          | Control            | KD           |               |                      |
| <b>N (oocytes scored)</b>              | 49                                         | 40          | 30           | 23          | 79                 | 63           |               |                      |
|                                        | <b>% Oocytes with Cohesion Defects (#)</b> |             |              |             |                    |              |               |                      |
| <b>Arm Defects Only</b>                | 14.3<br>(7)                                | 20.0<br>(8) | 3.3<br>(1)   | 17.4<br>(4) | 10.1<br>(8)        | 19.0<br>(12) | -             | -                    |
| <b>Centromere Defects Only</b>         | 0                                          | 0           | 0            | 0           | 0                  | 0            | -             | -                    |
| <b>Both Arm and Centromere Defects</b> | 0                                          | 0           | 0            | 0           | 0                  | 0            | -             | -                    |
| <b>Total Arm Defects*</b>              | 14.3<br>(7)                                | 20.0<br>(8) | 3.3<br>(1)   | 17.4<br>(4) | 10.1<br>(8)        | 19.0<br>(12) | 1.88          | 0.150                |

| SOD2 <sup>V20</sup> with <i>mtrm</i> <sup>+/-</sup> | Experiment 1                               |             | Experiment 2 |             | Sum of Experiments |              | Fold Increase | P-value <sup>§</sup> |
|-----------------------------------------------------|--------------------------------------------|-------------|--------------|-------------|--------------------|--------------|---------------|----------------------|
|                                                     | Control                                    | KD          | Control      | KD          | Control            | KD           |               |                      |
| <b>N (oocytes scored)</b>                           | 44                                         | 40          | 73           | 56          | 117                | 96           |               |                      |
|                                                     | <b>% Oocytes with Cohesion Defects (#)</b> |             |              |             |                    |              |               |                      |
| <b>Arm Defects Only</b>                             | 6.8<br>(3)                                 | 10.0<br>(4) | 9.6<br>(7)   | 16.1<br>(9) | 8.5<br>(10)        | 13.5<br>(13) | -             | -                    |
| <b>Centromere Defects Only</b>                      | 0                                          | 0           | 0            | 1.8<br>(1)  | 0                  | 1.0<br>(1)   | -             | -                    |
| <b>Both Arm and Centromere Defects</b>              | 0                                          | 2.5<br>(1)  | 0            | 0           | 0                  | 1.0<br>(1)   | -             | -                    |
| <b>Total Arm Defects*</b>                           | 6.8<br>(3)                                 | 12.5<br>(5) | 9.6<br>(7)   | 16.1<br>(9) | 8.5<br>(10)        | 14.6<br>(14) | 1.71          | 0.194                |

| SOD1 <sup>V20</sup> with <i>mtrm</i> <sup>+/-</sup> | Experiment 1                               |             | Experiment 2 |              | Sum of Experiments |              | Fold Increase | P-value <sup>§</sup> |
|-----------------------------------------------------|--------------------------------------------|-------------|--------------|--------------|--------------------|--------------|---------------|----------------------|
|                                                     | Control                                    | KD          | Control      | KD           | Control            | KD           |               |                      |
| <b>N (oocytes scored)</b>                           | 47                                         | 35          | 35           | 51           | 82                 | 86           |               |                      |
|                                                     | <b>% Oocytes with Cohesion Defects (#)</b> |             |              |              |                    |              |               |                      |
| <b>Arm Defects Only</b>                             | 4.3<br>(2)                                 | 11.4<br>(4) | 14.3<br>(5)  | 17.6<br>(9)  | 8.5<br>(7)         | 15.1<br>(13) | -             | -                    |
| <b>Centromere Defects Only</b>                      | 0                                          | 0           | 2.9<br>(1)   | 0            | 1.2<br>(1)         | 0            | -             | -                    |
| <b>Both Arm and Centromere Defects</b>              | 0                                          | 0           | 0            | 2.0<br>(1)   | 0                  | 1.2<br>(1)   | -             | -                    |
| <b>Total Arm Defects*</b>                           | 4.3<br>(2)                                 | 11.4<br>(4) | 14.3<br>(5)  | 19.6<br>(10) | 8.5<br>(7)         | 16.3<br>(14) | 1.91          | 0.163                |

| SMC3 <sup>V20</sup>                    | Experiment 1                               |             | Fold Increase | P-value <sup>§</sup> |
|----------------------------------------|--------------------------------------------|-------------|---------------|----------------------|
|                                        | Control                                    | KD          |               |                      |
| <b>N (oocytes scored)</b>              | 59                                         | 49          |               |                      |
|                                        | <b>% Oocytes with Cohesion Defects (#)</b> |             |               |                      |
| <b>Arm Defects Only</b>                | 5.1<br>(3)                                 | 16.3<br>(8) | -             | -                    |
| <b>Centromere Defects Only</b>         | 0                                          | 0           | -             | -                    |
| <b>Both Arm and Centromere Defects</b> | 0                                          | 0           | -             | -                    |
| <b>Total Arm Defects*</b>              | 5.1<br>(3)                                 | 16.3<br>(8) | 3.21          | 0.064                |

| Sum of SOD Genotypes     | Ctrl                                       | KD           | Fold Increase | P-value <sup>§</sup> |
|--------------------------|--------------------------------------------|--------------|---------------|----------------------|
|                          | N                                          | N            |               |                      |
|                          | 278                                        | 249          |               |                      |
|                          | <b>% Oocytes with Cohesion Defects (#)</b> |              |               |                      |
| <b>Total Arm Defects</b> | 9.0<br>(25)                                | 16.1<br>(40) | 1.79          | 0.017                |

\* % total arm defects for each genotype graphed in Fig. 3C.

§ P-value calculated using Fisher's exact test.

**Table S7:** Recombinational History Data for SOD KD and control in *mtrm*<sup>+/-</sup>

| SOD1 <sup>V20</sup>                 | Experiment 1                                                     |              | Experiment 2            |              | Sum of Experiments |              | P-value<br>( $\chi^2$ test) |
|-------------------------------------|------------------------------------------------------------------|--------------|-------------------------|--------------|--------------------|--------------|-----------------------------|
|                                     | Control                                                          | KD           | Control                 | KD           | Control            | KD           |                             |
| N (flies scored)                    | 1714                                                             | 1619         | 1723                    | 1622         | 3437               | 3241         |                             |
|                                     | Frequency = X/N x 10 <sup>3</sup><br>(X = # of Diplos genotyped) |              |                         |              |                    |              |                             |
| Non-recombinant Diplos <sup>§</sup> | 1.2<br>(2)                                                       | 5.6<br>(9)   | 2.9<br>(5) <sup>§</sup> | 4.3<br>(7)   | 2.0<br>(7)         | 4.9<br>(16)  | 0.070                       |
| All Recombinant Diplos              | 2.9<br>(5)                                                       | 19.1<br>(31) | 5.2<br>(9)              | 12.9<br>(21) | 4.1<br>(14)        | 16.0<br>(52) | < 0.001                     |
| Recombinant Reductional Diplos      | 2.9<br>(5)                                                       | 17.3<br>(28) | 2.9<br>(5)              | 9.9<br>(16)  | 2.9<br>(10)        | 13.6<br>(44) | < 0.001                     |
| Recombinant Equational Diplos       | 0                                                                | 1.9<br>(3)   | 2.3<br>(4)              | 3.1<br>(5)   | 1.2<br>(4)         | 2.5<br>(8)   | 0.333                       |

| SOD2 <sup>V20</sup>            | Experiment 1                                                     |              | Experiment 2 |              | Sum of Experiments |              | P-value<br>( $\chi^2$ test) |
|--------------------------------|------------------------------------------------------------------|--------------|--------------|--------------|--------------------|--------------|-----------------------------|
|                                | Control                                                          | KD           | Control      | KD           | Control            | KD           |                             |
| N (flies scored)               | 1533                                                             | 813          | 1823         | 1730         | 3356               | 2543         |                             |
|                                | Frequency = X/N x 10 <sup>3</sup><br>(X = # of Diplos genotyped) |              |              |              |                    |              |                             |
| Non-recombinant Diplos*        | 2.0<br>(3)                                                       | 4.9<br>(4)   | 1.1<br>(2)   | 4.0<br>(7)   | 1.5<br>(5)         | 4.3<br>(11)  | 0.069                       |
| All Recombinant Diplos         | 2.0<br>(3)                                                       | 17.2<br>(14) | 6.0<br>(11)  | 16.2<br>(28) | 4.2<br>(14)        | 16.5<br>(42) | < 0.001                     |
| Recombinant Reductional Diplos | 1.3<br>(2)                                                       | 11.1<br>(9)  | 5.5<br>(10)  | 13.9<br>(24) | 3.6<br>(12)        | 13.0<br>(33) | < 0.001                     |
| Recombinant Equational Diplos  | 0.7<br>(1)                                                       | 6.2<br>(5)   | 0.5<br>(1)   | 2.3<br>(4)   | 0.6<br>(2)         | 3.5<br>(9)   | 0.022                       |

| SOD2 <sup>GD</sup>             | Experiment 1                                                     |              | Experiment 2 |              | Sum of Experiments |              | P-value<br>( $\chi^2$ test) |
|--------------------------------|------------------------------------------------------------------|--------------|--------------|--------------|--------------------|--------------|-----------------------------|
|                                | Control                                                          | KD           | Control      | KD           | Control            | KD           |                             |
| N (flies scored)               | 1798                                                             | 1799         | 2128         | 2085         | 3926               | 3884         |                             |
|                                | Frequency = X/N x 10 <sup>3</sup><br>(X = # of Diplos genotyped) |              |              |              |                    |              |                             |
| Non-recombinant Diplos*        | 2.2<br>(4)                                                       | 3.9<br>(7)   | 1.4<br>(3)   | 2.4<br>(5)   | 2.0<br>(8)         | 3.1<br>(12)  | 0.489                       |
| All Recombinant Diplos         | 4.4<br>(8)                                                       | 15.0<br>(27) | 6.6<br>(14)  | 12.0<br>(25) | 5.6<br>(22)        | 13.4<br>(52) | < 0.001                     |
| Recombinant Reductional Diplos | 4.4<br>(8)                                                       | 14.5<br>(26) | 6.1<br>(13)  | 11.5<br>(24) | 5.3<br>(21)        | 12.9<br>(50) | < 0.001                     |
| Recombinant Equational Diplos  | 0                                                                | 0.6<br>(1)   | 0.5<br>(1)   | 0.5<br>(1)   | 0.3<br>(1)         | 0.5<br>(2)   | 0.993                       |

<sup>§</sup> One non-recombinant Diplo arose from an equational error.

\*All non-recombinant Diplos arose from reductional errors.

**Table S8:** Fly stocks used in this study

| Genotype                                                                                              | Hairpin ID | Vector    | Abbreviation                | Source                                      | Bickel Stock # |
|-------------------------------------------------------------------------------------------------------|------------|-----------|-----------------------------|---------------------------------------------|----------------|
| $y^1 sc^1 v^1; P\{y^{+t7.7} v^{+t1.8}=TRiP.$<br><b>SOD2.HMS00499</b> }attP2                           | SH00930.N  | Valium 20 | SOD2<br>RNAi <sup>V20</sup> | TRiP<br>#32496                              | H-028          |
| $y; P\{y^{+t7.7} v^{+t1.8}=TRiP.$<br><b>SOD2.HMS00499</b> }attP2                                      | SH00930.N  | Valium 20 | SOD2<br>RNAi <sup>V20</sup> | Bickel lab<br>derivative of<br>H-028        | I-515          |
| $y^1 sc^1 v^1; P\{y^{+t7.7} v^{+t1.8}=TRiP.$<br><b>SOD1.HMS00698</b> }attP2 /<br>TM3 Sb <sup>1</sup>  | SH00934.N  | Valium 20 | SOD1<br>RNAi <sup>V20</sup> | TRiP<br>#32909                              | H-072          |
| $y; P\{y^{+t7.7} v^{+t1.8}=TRiP.$<br><b>SOD1.HMS00698</b> }attP2 /<br>TM3 Sb <sup>1</sup>             | SH00934.N  | Valium 20 | SOD1<br>RNAi <sup>V20</sup> | Bickel lab<br>derivative of<br>H-072        | I-513          |
| $w;$<br>$P\{VDRC.SOD2.42162,$<br>$w^+\}$                                                              | 14064      | GD        | SOD2<br>RNAi <sup>GD</sup>  | VDRC<br>#42162                              | V-036          |
| $y;$<br>$P\{VDRC.SOD2.42162,$<br>$w^+\}$                                                              | 14064      | GD        | SOD2<br>RNAi <sup>GD</sup>  | Bickel lab<br>derivative of<br>V-036        | I-514          |
| $y^1 sc^1 v^1; P\{y^{+t7.7} v^{+t1.8}=TRiP.$<br><b>SMC3.HMS00318</b> }attP2                           | SH00137.N  | Valium 20 |                             | TRiP<br>#33431                              | H-010          |
| $y; P\{y^{+t7.7} v^{+t1.8}=TRiP.$<br><b>SMC3.HMS00318</b> }attP2                                      | SH00137.N  | Valium 20 | SMC3<br>RNAi <sup>V20</sup> | Bickel lab<br>derivative of<br>H-010        | I-520          |
| $y w; smc1^{exc46} / TM3, Sb^1$<br>$Ser^1$                                                            |            |           | smc1 $\Delta$               | Hawley Lab                                  | M-720          |
| $y;$<br>$P\{VDRC.SOD2.42162,$<br>$w^+\}; smc1^{exc46} / TM3,$<br>$Ser^1$                              | 14064      | GD        |                             | Bickel Lab<br>derivative of<br>I-514, M-720 | I-540          |
| $y/y^+ Y; cn bw sp$                                                                                   |            |           |                             |                                             | I-454          |
| $y^1 Df(1)w^{67c23}$                                                                                  |            |           | $y w$                       |                                             | A-062          |
| $y^1; +; P\{SUPor-P,$<br>$y^{+mDint2}$<br>$w^{BR.E.BR}\}mtrm^{KG08051}$<br>$ry^{506}/TM3, Sb^1 Ser^1$ |            |           | $mtrm^{KG}$                 | Bloomington<br>#14932                       | M-755          |
| $y w / B^S Y; +;$<br>$mtrm^{KG}/TM3, Sb^1 Ser^1$                                                      |            |           |                             | Bickel lab<br>derivative of<br>M-755        | W-086          |

|                                                                                                                                                                                                     |  |  |                            |                                                  |       |
|-----------------------------------------------------------------------------------------------------------------------------------------------------------------------------------------------------|--|--|----------------------------|--------------------------------------------------|-------|
| <i>y sc cv v f car/B<sup>S</sup> Y ; + ;<br/>mtrm<sup>KG</sup>/TM3, Sb<sup>1</sup> Ser<sup>1</sup></i><br>Maintained as FM7a balanced stock                                                         |  |  |                            | Bickel lab<br>derivative of<br>W-086             | M-835 |
| <i>y sc cv v f car/B<sup>S</sup> Y ; + ;<br/>mtrm<sup>KG</sup>/TM3, Sb<sup>1</sup> Ser<sup>1</sup></i><br>Maintained with C(1)DX, y w f/B <sup>S</sup> Y<br>females                                 |  |  |                            | Bickel lab<br>derivative of<br>W-086             | M-836 |
| <i>w<sup>*</sup> ; P{w<sup>+mC</sup>=matalpha4-<br/>GAL4-VP16}V37</i>                                                                                                                               |  |  | matα<br>driver             | Bloomington<br>#7063                             | T-273 |
| <i>y w ; + ;<br/>P{w<sup>+mC</sup>=matalpha4-<br/>GAL4-VP16}V37</i>                                                                                                                                 |  |  |                            | Bickel lab<br>derivative of<br>T-273             | W-063 |
| <i>y w / B<sup>S</sup> Y ; + ; mtrm<sup>KG</sup><br/>P{w<sup>+mC</sup>=matalpha4-<br/>GAL4-VP16}V37/TM3,<br/>Sb</i>                                                                                 |  |  |                            | Bickel lab<br>derivative of<br>W-086, &<br>T-273 | W-076 |
| <i>y sc cv v f car/B<sup>S</sup> Y ; + ;<br/>mtrm<sup>KG</sup><br/>P{w<sup>+mC</sup>=matalpha4-<br/>GAL4-VP16}V37 /TM3,<br/>Sb<sup>1</sup> Ser<sup>1</sup></i><br>Maintained as FM7a balanced stock |  |  |                            | Bickel lab<br>derivative of<br>W-076             | M-834 |
| <i>y sc cv v f car/B<sup>S</sup> Y</i><br>Maintained with C(1)DX, y w f/B <sup>S</sup> Y<br>females                                                                                                 |  |  |                            |                                                  | A-192 |
| <i>y sc cv v f car/B<sup>S</sup> Y ;<br/>P{w<sup>+mC</sup>=matalpha4-<br/>GAL4-VP16}V37</i><br>Maintained as FM7a balanced stock                                                                    |  |  |                            | Bickel lab<br>derivative of<br>T-712             | A-199 |
| <i>C(1)RM, y<sup>2</sup>, su(w<sup>a</sup>) w<sup>a</sup>/<br/>X<sup>^</sup>Y, v f B</i>                                                                                                            |  |  | X <sup>^</sup> Y,<br>v f B |                                                  | C-200 |
| <i>w<sup>1118</sup>, P{UAS-Dicer-2, w<sup>+</sup>}</i>                                                                                                                                              |  |  |                            | VDRC<br>#60007                                   | V-058 |
| <i>w<sup>1118</sup>, P{UAS-Dicer-2, w<sup>+</sup>}<br/>/ B<sup>S</sup>Y</i>                                                                                                                         |  |  |                            | Bickel lab<br>derivative of<br>V-058             | T-733 |
| <i>w<sup>1118</sup>, P{UAS-Dicer-2, w<sup>+</sup>}<br/>; Pin/CyO</i>                                                                                                                                |  |  |                            | VDRC<br>#60010                                   | V-061 |
| <i>w<sup>1118</sup>, P{UAS-Dicer-2, w<sup>+</sup>}<br/>; + ; Ly/ TM3</i>                                                                                                                            |  |  |                            | VDRC<br>#60011                                   | V-062 |
| <i>w<sup>1118</sup>, P{UAS-Dicer-2,<br/>w<sup>+</sup>}/B<sup>S</sup> Y;<br/>P{w<sup>+mC</sup>=matalpha4-<br/>GAL4-VP16}V37</i>                                                                      |  |  |                            | Bickel lab<br>derivative of<br>T-273 &<br>V-062  | T-712 |
